# Supplementary material for: Development of Highly Effective Anti-Mesothelin hYP218 Chimeric Antigen Receptor T Cells With Increased Tumor Infiltration and Persistence for Treating Solid Tumors
Source: Oxford University Press journal article supplement (doi:10.1158/1535-7163.mct-22-0073), 2022-05-02
Supplement: mct-22-0073-sts1a.docx [file mct-22-0073-sts1a.docx]

**Supplementary Table S1A: Determination of MSLN binding epitope**

| **mAb used (Amino acid positions)** | **A450** | | | **Average** |
| --- | --- | --- | --- | --- |
| **rFc-MSLN (501-599)** | 1.289 | 1.2958 | 1.2632 | 1.28 |
| **full length MSLN (296-580)** | 1.0839 | 1.0882 | 1.0933 | 1.09 |
| **region III MSLN (487-580)** | 0.6599 | 0.556 | 0.5904 | 0.6 |
| **Rabbit IgG control** | 0.1417 | 0.1448 | 0.1508 | 0.15 |
| **BSA control** | 0.0907 | 0.0659 | 0.0577 | 0.07 |
