# Supplementary material for: Development of Highly Effective Anti-Mesothelin hYP218 Chimeric Antigen Receptor T Cells With Increased Tumor Infiltration and Persistence for Treating Solid Tumors
Source: Oxford University Press journal article supplement (doi:10.1158/1535-7163.mct-22-0073), 2022-05-02
Supplement: mct-22-0073-sts1b.docx [file mct-22-0073-sts1b.docx]

**Supplementary Table S1B: Narrowing down of MSLN binding epitope**

| **Concentration** | **A450** | | |
| --- | --- | --- | --- |
| **mcg/mL** | **501-535*** | **525-560*** | **550-581*** |
| 1 | 0.666367 | 1.051767 | 0.457033 |
| 0.5 | 0.69 | 1.0338 | 0.4253 |
| 0.25 | 0.689367 | 1.0571 | 0.4439 |
| 0.125 | 0.562067 | 1.062767 | 0.458733 |
| 0.06 | 0.554633 | 0.9671 | 0.411767 |
| 0.03 | ---- | 0.962867 | 0.391533 |
| PBS | 0.0348 | 0.0349 | 0.0452 |

*Amino acid positions of the peptide fragment used
