# Supplementary material for: Development of Highly Effective Anti-Mesothelin hYP218 Chimeric Antigen Receptor T Cells With Increased Tumor Infiltration and Persistence for Treating Solid Tumors
Source: Oxford University Press journal article supplement (doi:10.1158/1535-7163.mct-22-0073), 2022-05-02
Supplement: mct-22-0073-sts1c.docx [file mct-22-0073-sts1c.docx]

**Supplementary Table S1C: Cross competition assay***

|  |  | **Competitor** | | |
| --- | --- | --- | --- | --- |
|  |  | **MUC16** | **HN1** | **hYP218** |
| **Binder** | **MUC16** | 1 | 25 | 60 |
| **HN1** | 27 | 0 | 142 |
| **hYP218** | 91 | 108 | 3 |

*****Percent residual binding was calculated as follows: (response signal from the second ligand in the presence of first ligand/response signal from the second ligand in the absence of the first ligand) x 100.
