# Supplementary material for: Development of Highly Effective Anti-Mesothelin hYP218 Chimeric Antigen Receptor T Cells With Increased Tumor Infiltration and Persistence for Treating Solid Tumors
Source: Oxford University Press journal article supplement (doi:10.1158/1535-7163.mct-22-0073), 2022-05-02
Supplement: mct-22-0073-sts2.docx [file mct-22-0073-sts2.docx]

**Supplementary Table S2: Binding kinetics of hYP218 and YP218.**

| **Antibody** | **KD (M)** | **KD Error** | **kon(1/Ms)** | **kon Error** | **kdis(1/s)** | **kdis Error** | **kdis(1/s)** | **kdis Error** |
| --- | --- | --- | --- | --- | --- | --- | --- | --- |
| hYP218 | 6.90E-11 | 2.07E-12 | 2.46E+05 | 7.18E+02 | 1.70E-05 | 5.06E-07 | 1.70E-05 | 5.06E-07 |
| YP218 | 2.46E-10 | 4.83E-12 | 3.99E+04 | 1.54E+02 | 9.82E-06 | 1.89E-07 | 9.82E-06 | 1.89E-07 |
